# Supplementary material for: Identification of motor neurons and a mechanosensitive sensory neuron in the defecation circuitry of Drosophila larvae
Source: eLife journal article supplement (doi:10.7554/elife.03293), 2014-10-30
Supplement: supp [file elife-03293-supp-v1.zip]

Archive with 18 entries (18 files):
- elife_poa_e03293_Figure_6_figure_supplement_1.pdf
- elife_poa_e03293_Figure_5_figure_supplement_2.pdf
- elife_poa_e03293_Video_3.avi
- elife_poa_e03293_Figure_4_figure_supplement_1.pdf
- elife_poa_e03293_Figure_4_figure_supplement_3.pdf
- elife_poa_e03293_Video_6.avi
- elife_poa_e03293_Video_1.mov
- elife_poa_e03293_Figure_5_figure_supplement_1.pdf
- elife_poa_e03293_Video_4.avi
- elife_poa_e03293_Video_10.avi
- elife_poa_e03293_Video_7.avi
- elife_poa_e03293_Video_2.avi
- elife_poa_e03293_Video_9.avi
- elife_poa_e03293_Video_8.avi
- elife_poa_e03293_Figure_4_figure_supplement_2.pdf
- elife_poa_e03293_Figure_1_figure_supplement_2.pdf
- elife_poa_e03293_Figure_1_figure_supplement_1.pdf
- elife_poa_e03293_Video_5.avi
