# Supplementary material for: Identification of motor neurons and a mechanosensitive sensory neuron in the defecation circuitry of Drosophila larvae
Source: eLife journal article supplement (doi:10.7554/elife.03293), 2014-10-30
Supplement: supp [file elife-03293-supp-v1.zip › elife_poa_e03293_Figure_4_figure_supplement_2.pdf]

Figure 4-figure supplement 2, Zhang, et. al.

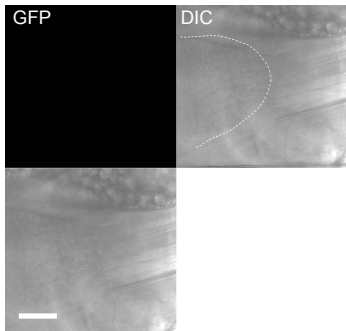

w; UAS-CD4-sp1-10/cyo;  
HGN1-Gal4/ LexaOp-CD4-sp11

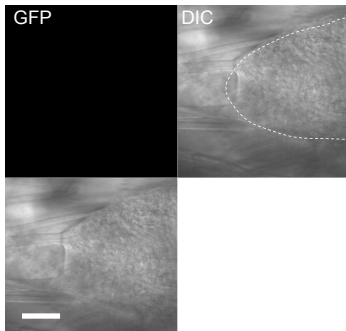

w; PDF-LexA /UAS-CD4-sp1-10;  
LexAOp-cd4-sp11/TM2
