# Supplementary figures and images for: Identification of motor neurons and a mechanosensitive sensory neuron in the defecation circuitry of Drosophila larvae
Source: eLife journal article supplement (doi:10.7554/elife.03293), 2014-10-30

Figure 4-figure supplement 1

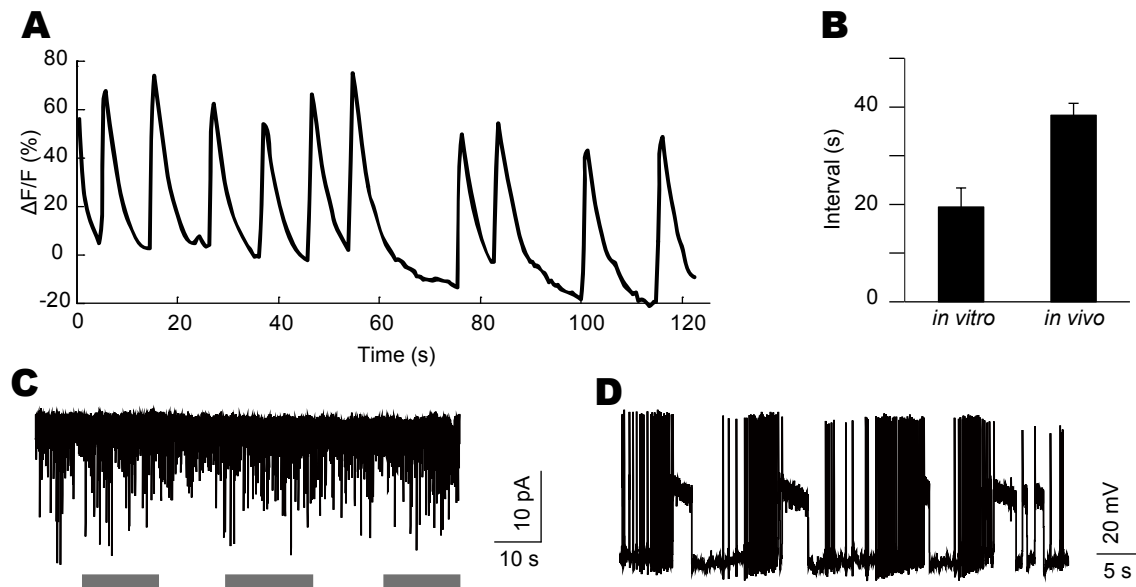

Supplement: supp [file elife-03293-supp-v1.zip]

Figure 6-figure supplement 1, Zhang, et. al.

anti-NOMPC

PPK>GFP

Merge

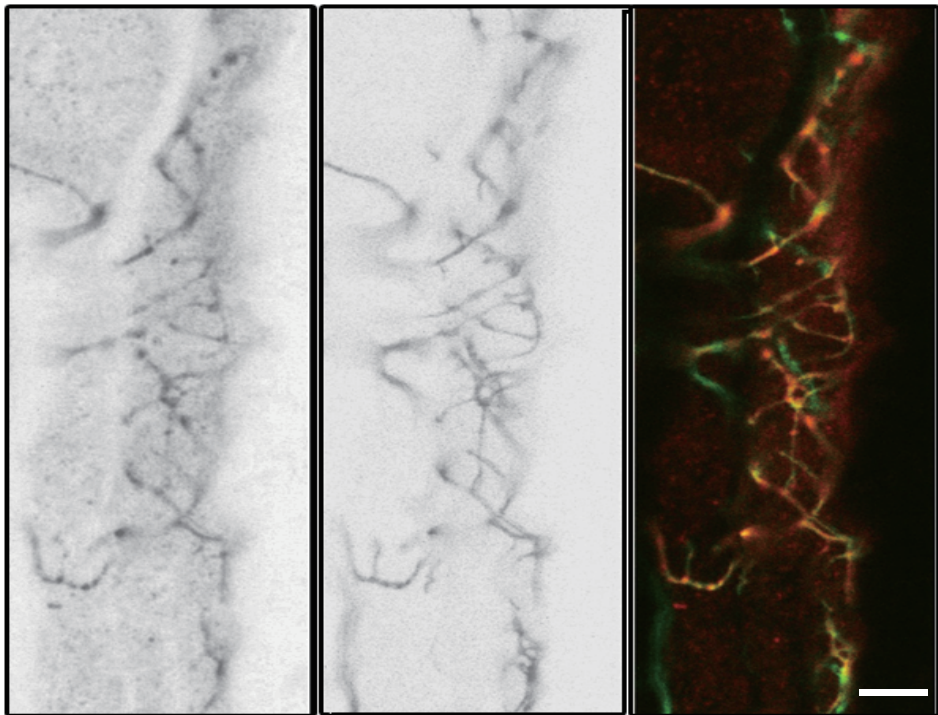

Supplement: supp [file elife-03293-supp-v1.zip › elife_poa_e03293_Figure_6_figure_supplement_1.pdf]

Figure 5-figure supplement 2, Zhang, et al.

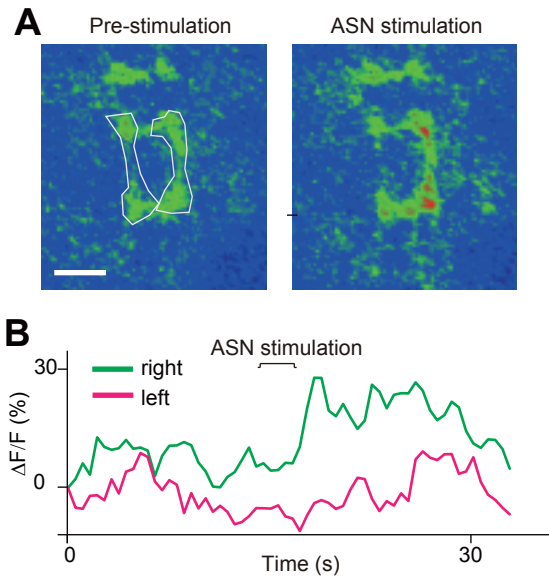

Supplement: supp [file elife-03293-supp-v1.zip › elife_poa_e03293_Figure_5_figure_supplement_2.pdf]

Figure 4-figure supplement 3, Zhang, et. al.

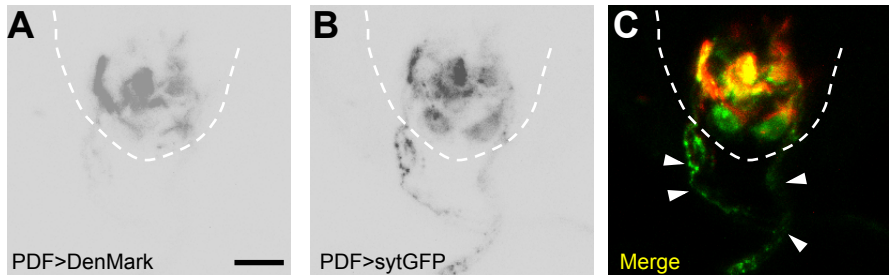

Supplement: supp [file elife-03293-supp-v1.zip › elife_poa_e03293_Figure_4_figure_supplement_3.pdf]

Figure 5-figure supplement 1

DIC

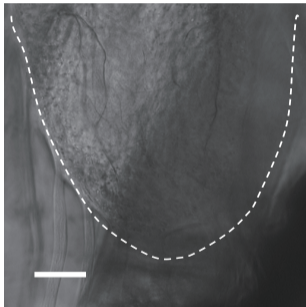

Tomato

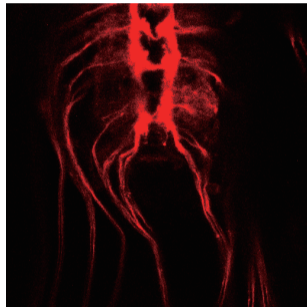

Merge

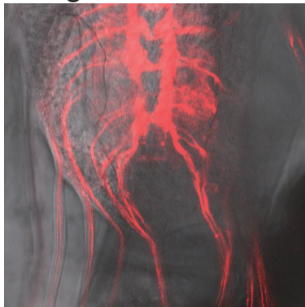

ppk-Tomato-sp11/HGN1-Gal4

Supplement: supp [file elife-03293-supp-v1.zip › elife_poa_e03293_Figure_5_figure_supplement_1.pdf]

Figure 1-figure supplement 2, Zhang, et. al.

vGlut>tdTomato

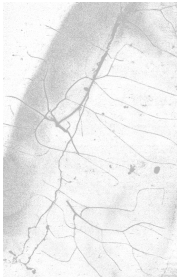

PDF>GFP

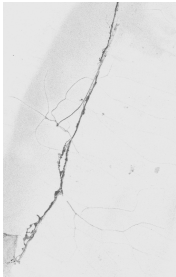

Merge

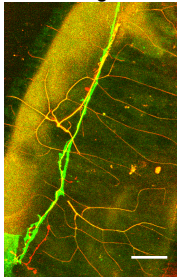

Supplement: supp [file elife-03293-supp-v1.zip › elife_poa_e03293_Figure_1_figure_supplement_2.pdf]

Figure 1-figure supplement 1, Zhang, et.al.

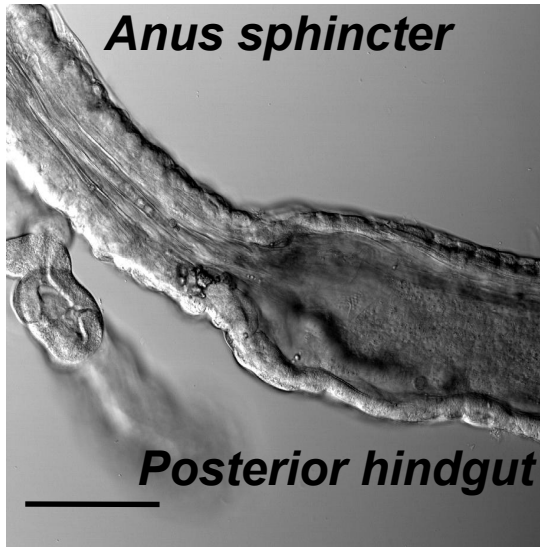

Supplement: supp [file elife-03293-supp-v1.zip › elife_poa_e03293_Figure_1_figure_supplement_1.pdf]
